# Supplementary material for: Differential Transcriptome Profile of Peripheral White Cells to Identify Biomarkers Involved in Oxaliplatin Induced Neuropathy
Source: MDPI journal article supplement (doi:10.3390/jpm4020282), 2014-06-05
Supplement: s1 [file s1]

Supplementary Material for

## Differential Transcriptome Profile of Peripheral White Cells to Identify Biomarkers Involved in Oxaliplatin Induced Neuropathy

| Gene                                                                                                      | Fold Change | <i>p</i> _value | Description                                                                                                                      |
|-----------------------------------------------------------------------------------------------------------|-------------|-----------------|----------------------------------------------------------------------------------------------------------------------------------|
| <b>Genes whose expression increased after three cycles of oxaliplatin therapy (in alphabetical order)</b> |             |                 |                                                                                                                                  |
| A4GALT                                                                                                    | 5.8         | 0.017           | alpha 1,4-galactosyltransferase [Source:HGNC Symbol;Acc:18149]                                                                   |
| AGRN                                                                                                      | 2.8         | 0.001           | agrin [Source:HGNC Symbol;Acc:329]                                                                                               |
| AIF1                                                                                                      | 3.4         | 0.000           | allograft inflammatory factor 1 [Source:HGNC Symbol;Acc:352]                                                                     |
| AKAP12                                                                                                    | 4.5         | 0.007           | A kinase (PRKA) anchor protein 12 [Source:HGNC Symbol;Acc:370]                                                                   |
| AKR1C2                                                                                                    | 8.0         | 0.006           | aldo-keto reductase family 1, member C2 [Source:HGNC Symbol;Acc:385]                                                             |
| ALDH3A1                                                                                                   | 4.3         | 0.042           | aldehyde dehydrogenase 3 family, member A1 [Source:HGNC Symbol;Acc:405]                                                          |
| AMOTL2                                                                                                    | 3.5         | 0.047           | angiomin like 2 [Source:HGNC Symbol;Acc:17812]                                                                                   |
| ANTXR1                                                                                                    | 4.5         | 0.006           | anthrax toxin receptor 1 [Source:HGNC Symbol;Acc:21014]                                                                          |
| ANXA1                                                                                                     | 1.7         | 0.031           | annexin A1 [Source:HGNC Symbol;Acc:533]                                                                                          |
| ANXA2                                                                                                     | 1.8         | 0.027           | annexin A2 [Source:HGNC Symbol;Acc:537]                                                                                          |
| AP1M2                                                                                                     | 3.8         | 0.026           | adaptor-related protein complex 1, mu 2 subunit [Source:HGNC Symbol;Acc:558]                                                     |
| AP2S1                                                                                                     | 1.7         | 0.033           | adaptor-related protein complex 2, sigma 1 subunit [Source:HGNC Symbol;Acc:565]                                                  |
| ARHGEF17                                                                                                  | 5.0         | 0.026           | Rho guanine nucleotide exchange factor (GEF) 17 [Source:HGNC Symbol;Acc:21726]                                                   |
| ASGR1                                                                                                     | 2.9         | 0.012           | asialoglycoprotein receptor 1 [Source:HGNC Symbol;Acc:742]                                                                       |
| ASPHD1                                                                                                    | 7.2         | 0.028           | aspartate beta-hydroxylase domain containing 1 [Source:HGNC Symbol;Acc:27380]                                                    |
| ATP5EP2                                                                                                   | 5.2         | 0.003           | ATP synthase, H <sup>+</sup> transporting, mitochondrial F1 complex, epsilon subunit pseudogene 2 [Source:HGNC Symbol;Acc:34026] |
| ATP5F1                                                                                                    | 2.3         | 0.017           | ATP synthase, H <sup>+</sup> transporting, mitochondrial Fo complex, subunit B1 [Source:HGNC Symbol;Acc:840]                     |
| ATP5I                                                                                                     | 3.5         | 0.001           | ATP synthase, H <sup>+</sup> transporting, mitochondrial Fo complex, subunit E [Source:HGNC Symbol;Acc:846]                      |
| ATPIF1                                                                                                    | 2.0         | 0.030           | ATPase inhibitory factor 1 [Source:HGNC Symbol;Acc:871]                                                                          |

|          |      |       |                                                                                   |
|----------|------|-------|-----------------------------------------------------------------------------------|
| AXL      | 4.3  | 0.002 | AXL receptor tyrosine kinase [Source:HGNC Symbol;Acc:905]                         |
| BASP1    | 2.1  | 0.005 | brain abundant, membrane attached signal protein 1 [Source:HGNC Symbol;Acc:957]   |
| BCAM     | 6.6  | 0.012 | basal cell adhesion molecule (Lutheran blood group) [Source:HGNC Symbol;Acc:6722] |
| BCAR1    | 10.0 | 0.003 | breast cancer anti-estrogen resistance 1 [Source:HGNC Symbol;Acc:971]             |
| BEGAIN   | 4.2  | 0.013 | brain-enriched guanylate kinase-associated [Source:HGNC Symbol;Acc:24163]         |
| BGN      | 7.0  | 0.003 | biglycan [Source:HGNC Symbol;Acc:1044]                                            |
| BIRC5    | 4.2  | 0.002 | baculoviral IAP repeat containing 5 [Source:HGNC Symbol;Acc:593]                  |
| BLVRB    | 1.7  | 0.049 | biliverdin reductase B (flavin reductase (NADPH)) [Source:HGNC Symbol;Acc:1063]   |
| BMP4     | 9.1  | 0.031 | bone morphogenetic protein 4 [Source:HGNC Symbol;Acc:1071]                        |
| BMPR1B   | 18.7 | 0.005 | bone morphogenetic protein receptor, type IB [Source:HGNC Symbol;Acc:1077]        |
| C1QA     | 2.8  | 0.005 | complement component 1, q subcomponent, A chain [Source:HGNC Symbol;Acc:1241]     |
| C1QB     | 3.0  | 0.007 | complement component 1, q subcomponent, B chain [Source:HGNC Symbol;Acc:1242]     |
| CALD1    | 2.9  | 0.006 | caldesmon 1 [Source:HGNC Symbol;Acc:1441]                                         |
| CALU     | 2.1  | 0.041 | calumenin [Source:HGNC Symbol;Acc:1458]                                           |
| CAV1     | 2.9  | 0.006 | caveolin 1, caveolae protein, 22kDa [Source:HGNC Symbol;Acc:1527]                 |
| CBS      | 10.4 | 0.000 | cystathionine-beta-synthase [Source:HGNC Symbol;Acc:1550]                         |
| CCDC80   | 3.2  | 0.046 | coiled-coil domain containing 80 [Source:HGNC Symbol;Acc:30649]                   |
| CCNB1    | 2.4  | 0.022 | cyclin B1 [Source:HGNC Symbol;Acc:1579]                                           |
| CCT5     | 1.8  | 0.014 | chaperonin containing TCP1, subunit 5 (epsilon) [Source:HGNC Symbol;Acc:1618]     |
| CD276    | 3.6  | 0.019 | CD276 molecule [Source:HGNC Symbol;Acc:19137]                                     |
| CD300E   | 1.7  | 0.048 | CD300e molecule [Source:HGNC Symbol;Acc:28874]                                    |
| CD300LB  | 1.8  | 0.048 | CD300 molecule-like family member b [Source:HGNC Symbol;Acc:30811]                |
| CD63     | 1.7  | 0.027 | CD63 molecule [Source:HGNC Symbol;Acc:1692]                                       |
| CD86     | 1.7  | 0.046 | CD86 molecule [Source:HGNC Symbol;Acc:1705]                                       |
| CDA      | 2.0  | 0.015 | cytidine deaminase [Source:HGNC Symbol;Acc:1712]                                  |
| CDC20    | 2.2  | 0.048 | cell division cycle 20 [Source:HGNC Symbol;Acc:1723]                              |
| CDC25A   | 3.9  | 0.025 | cell division cycle 25A [Source:HGNC Symbol;Acc:1725]                             |
| CDC42EP1 | 5.6  | 0.001 | CDC42 effector protein (Rho GTPase binding) 1 [Source:HGNC Symbol;Acc:17014]      |
| CDC6     | 4.6  | 0.007 | cell division cycle 6 [Source:HGNC Symbol;Acc:1744]                               |

|         |      |       |                                                                                 |
|---------|------|-------|---------------------------------------------------------------------------------|
| CDCP1   | 4.9  | 0.003 | CUB domain containing protein 1 [Source:HGNC Symbol;Acc:24357]                  |
| CDH13   | 5.0  | 0.009 | cadherin 13, H-cadherin (heart) [Source:HGNC Symbol;Acc:1753]                   |
| CDH2    | 4.7  | 0.003 | cadherin 2, type 1, N-cadherin (neuronal) [Source:HGNC Symbol;Acc:1759]         |
| CDKN1C  | 2.0  | 0.014 | cyclin-dependent kinase inhibitor 1C (p57, Kip2) [Source:HGNC Symbol;Acc:1786]  |
| CDKN2A  | 4.6  | 0.002 | cyclin-dependent kinase inhibitor 2A [Source:HGNC Symbol;Acc:1787]              |
| CDR2L   | 12.4 | 0.018 | cerebellar degeneration-related protein 2-like [Source:HGNC Symbol;Acc:29999]   |
| CDT1    | 4.1  | 0.027 | chromatin licensing and DNA replication factor 1 [Source:HGNC Symbol;Acc:24576] |
| CEBPA   | 1.9  | 0.035 | CCAAT/enhancer binding protein (C/EBP), alpha [Source:HGNC Symbol;Acc:1833]     |
| CENPF   | 2.2  | 0.024 | centromere protein F, 350/400kDa [Source:HGNC Symbol;Acc:1857]                  |
| CES1    | 1.8  | 0.039 | carboxylesterase 1 [Source:HGNC Symbol;Acc:1863]                                |
| CFP     | 1.6  | 0.046 | complement factor properdin [Source:HGNC Symbol;Acc:8864]                       |
| CGA     | 4.8  | 0.041 | glycoprotein hormones, alpha polypeptide [Source:HGNC Symbol;Acc:1885]          |
| CLDN1   | 3.7  | 0.031 | claudin 1 [Source:HGNC Symbol;Acc:2032]                                         |
| CNRIP1  | 5.9  | 0.030 | cannabinoid receptor interacting protein 1 [Source:HGNC Symbol;Acc:24546]       |
| COL12A1 | 3.3  | 0.003 | collagen, type XII, alpha 1 [Source:HGNC Symbol;Acc:2188]                       |
| COL1A1  | 7.5  | 0.000 | collagen, type I, alpha 1 [Source:HGNC Symbol;Acc:2197]                         |
| COL3A1  | 4.5  | 0.000 | collagen, type III, alpha 1 [Source:HGNC Symbol;Acc:2201]                       |
| COL4A1  | 4.9  | 0.008 | collagen, type IV, alpha 1 [Source:HGNC Symbol;Acc:2202]                        |
| COL4A2  | 10.1 | 0.000 | collagen, type IV, alpha 2 [Source:HGNC Symbol;Acc:2203]                        |
| COL7A1  | 16.5 | 0.000 | collagen, type VII, alpha 1 [Source:HGNC Symbol;Acc:2214]                       |
| COX6C   | 1.8  | 0.027 | cytochrome c oxidase subunit VIc [Source:HGNC Symbol;Acc:2285]                  |
| COX7B   | 2.4  | 0.001 | cytochrome c oxidase subunit VIIb [Source:HGNC Symbol;Acc:2291]                 |
| COX7C   | 1.7  | 0.027 | cytochrome c oxidase subunit VIIc [Source:HGNC Symbol;Acc:2292]                 |
| CPA4    | 5.4  | 0.002 | carboxypeptidase A4 [Source:HGNC Symbol;Acc:15740]                              |
| CREB3L1 | 4.6  | 0.012 | cAMP responsive element binding protein 3-like 1 [Source:HGNC Symbol;Acc:18856] |
| CSDA    | 1.6  | 0.041 | cold shock domain protein A [Source:HGNC Symbol;Acc:2428]                       |
| CSTA    | 3.2  | 0.000 | cystatin A (stefin A) [Source:HGNC Symbol;Acc:2481]                             |
| CTGF    | 4.7  | 0.011 | connective tissue growth factor [Source:HGNC Symbol;Acc:2500]                   |
| CYC1    | 1.8  | 0.020 | cytochrome c-1 [Source:HGNC Symbol;Acc:2579]                                    |

|          |      |       |                                                                                                    |
|----------|------|-------|----------------------------------------------------------------------------------------------------|
| CYR61    | 6.1  | 0.001 | cysteine-rich, angiogenic inducer, 61 [Source:HGNC Symbol;Acc:2654]                                |
| DHRS4    | 3.1  | 0.048 | dehydrogenase/reductase (SDR family) member 4 [Source:HGNC Symbol;Acc:16985]                       |
| DIO2     | 6.5  | 0.002 | deiodinase, iodothyronine, type II [Source:HGNC Symbol;Acc:2884]                                   |
| DLX1     | 7.3  | 0.022 | distal-less homeobox 1 [Source:HGNC Symbol;Acc:2914]                                               |
| DSG2     | 2.6  | 0.040 | desmoglein 2 [Source:HGNC Symbol;Acc:3049]                                                         |
| DYNLL1   | 1.9  | 0.012 | dynein, light chain, LC8-type 1 [Source:HGNC Symbol;Acc:15476]                                     |
| EDF1     | 1.9  | 0.007 | endothelial differentiation-related factor 1 [Source:HGNC Symbol;Acc:3164]                         |
| EDIL3    | 3.1  | 0.005 | EGF-like repeats and discoidin I-like domains 3 [Source:HGNC Symbol;Acc:3173]                      |
| EFEMP1   | 4.3  | 0.006 | EGF containing fibulin-like extracellular matrix protein 1 [Source:HGNC Symbol;Acc:3218]           |
| EGFR     | 4.1  | 0.005 | epidermal growth factor receptor [Source:HGNC Symbol;Acc:3236]                                     |
| EHD2     | 5.1  | 0.003 | EH-domain containing 2 [Source:HGNC Symbol;Acc:3243]                                               |
| ELN      | 14.2 | 0.002 | elastin [Source:HGNC Symbol;Acc:3327]                                                              |
| EMP1     | 3.0  | 0.009 | epithelial membrane protein 1 [Source:HGNC Symbol;Acc:3333]                                        |
| ENAH     | 2.6  | 0.044 | enabled homolog (Drosophila) [Source:HGNC Symbol;Acc:18271]                                        |
| EPAS1    | 2.5  | 0.031 | endothelial PAS domain protein 1 [Source:HGNC Symbol;Acc:3374]                                     |
| EPHA2    | 3.7  | 0.012 | EPH receptor A2 [Source:HGNC Symbol;Acc:3386]                                                      |
| EXO1     | 3.6  | 0.045 | exonuclease 1 [Source:HGNC Symbol;Acc:3511]                                                        |
| EYA4     | 3.5  | 0.036 | eyes absent homolog 4 (Drosophila) [Source:HGNC Symbol;Acc:3522]                                   |
| FAM114A1 | 4.5  | 0.026 | family with sequence similarity 114, member A1 [Source:HGNC Symbol;Acc:25087]                      |
| FAM129B  | 2.1  | 0.003 | family with sequence similarity 129, member B [Source:HGNC Symbol;Acc:25282]                       |
| FAM228B  | 4.3  | 0.030 | family with sequence similarity 228, member B [Source:HGNC Symbol;Acc:24736]                       |
| FAM83H   | 2.8  | 0.015 | family with sequence similarity 83, member H [Source:HGNC Symbol;Acc:24797]                        |
| FBLN1    | 5.7  | 0.001 | fibulin 1 [Source:HGNC Symbol;Acc:3600]                                                            |
| FBN1     | 3.0  | 0.011 | fibrillin 1 [Source:HGNC Symbol;Acc:3603]                                                          |
| FBN2     | 2.2  | 0.014 | fibrillin 2 [Source:HGNC Symbol;Acc:3604]                                                          |
| FBP1     | 2.1  | 0.011 | fructose-1,6-bisphosphatase 1 [Source:HGNC Symbol;Acc:3606]                                        |
| FCER1A   | 2.2  | 0.019 | Fc fragment of IgE, high affinity I, receptor for; alpha polypeptide [Source:HGNC Symbol;Acc:3609] |
| FCN1     | 1.8  | 0.031 | ficolin (collagen/fibrinogen domain containing) 1 [Source:HGNC Symbol;Acc:3623]                    |
| FGF2     | 3.0  | 0.050 | fibroblast growth factor 2 (basic) [Source:HGNC Symbol;Acc:3676]                                   |

|            |     |       |                                                                                                         |
|------------|-----|-------|---------------------------------------------------------------------------------------------------------|
| FJX1       | 5.5 | 0.038 | four jointed box 1 (Drosophila) [Source:HGNC Symbol;Acc:17166]                                          |
| FKBP10     | 3.6 | 0.008 | FK506 binding protein 10, 65 kDa [Source:HGNC Symbol;Acc:18169]                                         |
| FLNC       | 7.5 | 0.000 | filamin C, gamma [Source:HGNC Symbol;Acc:3756]                                                          |
| FN1        | 4.0 | 0.000 | fibronectin 1 [Source:HGNC Symbol;Acc:3778]                                                             |
| FOLR1      | 4.7 | 0.043 | folate receptor 1 (adult) [Source:HGNC Symbol;Acc:3791]                                                 |
| FOSB       | 2.0 | 0.037 | FBJ murine osteosarcoma viral oncogene homolog B [Source:HGNC Symbol;Acc:3797]                          |
| FOXM1      | 2.5 | 0.007 | forkhead box M1 [Source:HGNC Symbol;Acc:3818]                                                           |
| FOXQ1      | 6.4 | 0.049 | forkhead box Q1 [Source:HGNC Symbol;Acc:20951]                                                          |
| FSCN1      | 3.0 | 0.044 | fascin homolog 1, actin-bundling protein (Strongylocentrotus purpuratus) [Source:HGNC Symbol;Acc:11148] |
| FSTL1      | 2.8 | 0.018 | folistatin-like 1 [Source:HGNC Symbol;Acc:3972]                                                         |
| GABRE      | 3.2 | 0.031 | gamma-aminobutyric acid (GABA) A receptor, epsilon [Source:HGNC Symbol;Acc:4085]                        |
| GADD45GIP1 | 3.1 | 0.012 | growth arrest and DNA-damage-inducible, gamma interacting protein 1 [Source:HGNC Symbol;Acc:29996]      |
| GAR1       | 2.6 | 0.039 | GAR1 ribonucleoprotein homolog (yeast) [Source:HGNC Symbol;Acc:14264]                                   |
| GDF15      | 6.8 | 0.014 | growth differentiation factor 15 [Source:HGNC Symbol;Acc:30142]                                         |
| GNA15      | 1.8 | 0.034 | guanine nucleotide binding protein (G protein), alpha 15 (Gq class) [Source:HGNC Symbol;Acc:4383]       |
| GNG12      | 2.6 | 0.030 | guanine nucleotide binding protein (G protein), gamma 12 [Source:HGNC Symbol;Acc:19663]                 |
| GPC1       | 5.0 | 0.004 | glypican 1 [Source:HGNC Symbol;Acc:4449]                                                                |
| GPNCMB     | 4.7 | 0.030 | glycoprotein (transmembrane) nmb [Source:HGNC Symbol;Acc:4462]                                          |
| GPRC5A     | 3.6 | 0.005 | G protein-coupled receptor, family C, group 5, member A [Source:HGNC Symbol;Acc:9836]                   |
| GPRC5C     | 2.9 | 0.040 | G protein-coupled receptor, family C, group 5, member C [Source:HGNC Symbol;Acc:13309]                  |
| GREM1      | 4.8 | 0.007 | gremlin 1 [Source:HGNC Symbol;Acc:2001]                                                                 |
| GSTO1      | 1.7 | 0.036 | glutathione S-transferase omega 1 [Source:HGNC Symbol;Acc:13312]                                        |
| GTF2IRD1   | 5.1 | 0.014 | GTF2I repeat domain containing 1 [Source:HGNC Symbol;Acc:4661]                                          |
| HBA1       | 2.3 | 0.002 | hemoglobin, alpha 1 [Source:HGNC Symbol;Acc:4823]                                                       |
| HBD        | 1.8 | 0.031 | hemoglobin, delta [Source:HGNC Symbol;Acc:4829]                                                         |
| HBG1       | 5.7 | 0.002 | hemoglobin, gamma A [Source:HGNC Symbol;Acc:4831]                                                       |
| HES1       | 4.6 | 0.022 | hairy and enhancer of split 1, (Drosophila) [Source:HGNC Symbol;Acc:5192]                               |
| HMOX1      | 1.8 | 0.020 | heme oxygenase (decycling) 1 [Source:HGNC Symbol;Acc:5013]                                              |
| HSPB8      | 7.1 | 0.022 | heat shock 22kDa protein 8 [Source:HGNC Symbol;Acc:30171]                                               |

|        |      |       |                                                                                                      |
|--------|------|-------|------------------------------------------------------------------------------------------------------|
| HTRA1  | 2.9  | 0.037 | HtrA serine peptidase 1 [Source:HGNC Symbol;Acc:9476]                                                |
| ID1    | 3.0  | 0.027 | inhibitor of DNA binding 1, dominant negative helix-loop-helix protein [Source:HGNC Symbol;Acc:5360] |
| IER5L  | 4.4  | 0.004 | immediate early response 5-like [Source:HGNC Symbol;Acc:23679]                                       |
| IFI6   | 1.8  | 0.030 | interferon, alpha-inducible protein 6 [Source:HGNC Symbol;Acc:4054]                                  |
| IGFBP4 | 2.7  | 0.002 | insulin-like growth factor binding protein 4 [Source:HGNC Symbol;Acc:5473]                           |
| IGFBP6 | 3.6  | 0.050 | insulin-like growth factor binding protein 6 [Source:HGNC Symbol;Acc:5475]                           |
| IGFN1  | 7.3  | 0.000 | immunoglobulin-like and fibronectin type III domain containing 1 [Source:HGNC Symbol;Acc:24607]      |
| IQGAP3 | 3.6  | 0.017 | IQ motif containing GTPase activating protein 3 [Source:HGNC Symbol;Acc:20669]                       |
| ISG15  | 1.9  | 0.029 | ISG15 ubiquitin-like modifier [Source:HGNC Symbol;Acc:4053]                                          |
| ITGA11 | 3.7  | 0.008 | integrin, alpha 11 [Source:HGNC Symbol;Acc:6136]                                                     |
| ITGA3  | 2.8  | 0.001 | integrin, alpha 3 (antigen CD49C, alpha 3 subunit of VLA-3 receptor) [Source:HGNC Symbol;Acc:6139]   |
| JUND   | 1.6  | 0.042 | jun D proto-oncogene [Source:HGNC Symbol;Acc:6206]                                                   |
| KCNK1  | 5.1  | 0.023 | potassium channel, subfamily K, member 1 [Source:HGNC Symbol;Acc:6272]                               |
| KIF18B | 2.7  | 0.034 | kinesin family member 18B [Source:HGNC Symbol;Acc:27102]                                             |
| KIF2C  | 3.4  | 0.039 | kinesin family member 2C [Source:HGNC Symbol;Acc:6393]                                               |
| KIRREL | 4.3  | 0.008 | kin of IRRE like (Drosophila) [Source:HGNC Symbol;Acc:15734]                                         |
| KLF10  | 1.7  | 0.033 | Kruppel-like factor 10 [Source:HGNC Symbol;Acc:11810]                                                |
| KLF11  | 1.8  | 0.028 | Kruppel-like factor 11 [Source:HGNC Symbol;Acc:11811]                                                |
| KRT18  | 6.1  | 0.012 | keratin 18 [Source:HGNC Symbol;Acc:6430]                                                             |
| KRT7   | 9.7  | 0.000 | keratin 7 [Source:HGNC Symbol;Acc:6445]                                                              |
| KRT8   | 13.5 | 0.002 | keratin 8 [Source:HGNC Symbol;Acc:6446]                                                              |
| KRT80  | 5.3  | 0.003 | keratin 80 [Source:HGNC Symbol;Acc:27056]                                                            |
| L1CAM  | 4.3  | 0.003 | L1 cell adhesion molecule [Source:HGNC Symbol;Acc:6470]                                              |
| LACE1  | 5.3  | 0.050 | lactation elevated 1 [Source:HGNC Symbol;Acc:16411]                                                  |
| LAIR2  | 9.1  | 0.000 | leukocyte-associated immunoglobulin-like receptor 2 [Source:HGNC Symbol;Acc:6478]                    |
| LAMA3  | 8.2  | 0.035 | laminin, alpha 3 [Source:HGNC Symbol;Acc:6483]                                                       |
| LAMA5  | 2.2  | 0.014 | laminin, alpha 5 [Source:HGNC Symbol;Acc:6485]                                                       |
| LAMB1  | 4.9  | 0.024 | laminin, beta 1 [Source:HGNC Symbol;Acc:6486]                                                        |
| LAMC1  | 2.4  | 0.004 | laminin, gamma 1 (formerly LAMB2) [Source:HGNC Symbol;Acc:6492]                                      |

|         |      |       |                                                                                                                        |
|---------|------|-------|------------------------------------------------------------------------------------------------------------------------|
| LAMTOR2 | 2.0  | 0.018 | late endosomal/lysosomal adaptor, MAPK and MTOR activator 2 [Source:HGNC Symbol;Acc:29796]                             |
| LGALS1  | 2.2  | 0.002 | lectin, galactoside-binding, soluble, 1 [Source:HGNC Symbol;Acc:6561]                                                  |
| LGALS2  | 1.8  | 0.022 | lectin, galactoside-binding, soluble, 2 [Source:HGNC Symbol;Acc:6562]                                                  |
| LIF     | 3.2  | 0.034 | leukemia inhibitory factor [Source:HGNC Symbol;Acc:6596]                                                               |
| LIMCH1  | 5.0  | 0.001 | LIM and calponin homology domains 1 [Source:HGNC Symbol;Acc:29191]                                                     |
| LMNA    | 3.2  | 0.000 | lamin A/C [Source:HGNC Symbol;Acc:6636]                                                                                |
| LRFN4   | 2.4  | 0.040 | leucine rich repeat and fibronectin type III domain containing 4 [Source:HGNC Symbol;Acc:28456]                        |
| LSM10   | 1.8  | 0.032 | LSM10, U7 small nuclear RNA associated [Source:HGNC Symbol;Acc:17562]                                                  |
| LURAP1L | 3.8  | 0.038 | leucine rich adaptor protein 1-like [Source:HGNC Symbol;Acc:31452]                                                     |
| LY6K    | 6.8  | 0.001 | lymphocyte antigen 6 complex, locus K [Source:HGNC Symbol;Acc:24225]                                                   |
| MAGEC1  | 15.5 | 0.008 | melanoma antigen family C, 1 [Source:HGNC Symbol;Acc:6812]                                                             |
| MAP1B   | 2.5  | 0.019 | microtubule-associated protein 1B [Source:HGNC Symbol;Acc:6836]                                                        |
| MARCKS  | 1.9  | 0.016 | myristoylated alanine-rich protein kinase C substrate [Source:HGNC Symbol;Acc:6759]                                    |
| MCAM    | 3.2  | 0.010 | melanoma cell adhesion molecule [Source:HGNC Symbol;Acc:6934]                                                          |
| MCM4    | 2.6  | 0.030 | minichromosome maintenance complex component 4 [Source:HGNC Symbol;Acc:6947]                                           |
| MDK     | 2.9  | 0.043 | midkine (neurite growth-promoting factor 2) [Source:HGNC Symbol;Acc:6972]                                              |
| MGST1   | 2.0  | 0.025 | microsomal glutathione S-transferase 1 [Source:HGNC Symbol;Acc:7061]                                                   |
| MGST2   | 2.3  | 0.032 | microsomal glutathione S-transferase 2 [Source:HGNC Symbol;Acc:7063]                                                   |
| MIB2    | 2.1  | 0.016 | mindbomb E3 ubiquitin protein ligase 2 [Source:HGNC Symbol;Acc:30577]                                                  |
| MKI67   | 2.0  | 0.009 | antigen identified by monoclonal antibody Ki-67 [Source:HGNC Symbol;Acc:7107]                                          |
| MMP2    | 3.3  | 0.016 | matrix metalloproteinase 2 (gelatinase A, 72 kDa gelatinase, 72 kDa type IV collagenase) [Source:HGNC Symbol;Acc:7166] |
| MRPL27  | 2.6  | 0.015 | mitochondrial ribosomal protein L27 [Source:HGNC Symbol;Acc:14483]                                                     |
| MRPL36  | 2.4  | 0.044 | mitochondrial ribosomal protein L36 [Source:HGNC Symbol;Acc:14490]                                                     |
| MRPL52  | 2.1  | 0.030 | mitochondrial ribosomal protein L52 [Source:HGNC Symbol;Acc:16655]                                                     |
| MRPL54  | 3.0  | 0.012 | mitochondrial ribosomal protein L54 [Source:HGNC Symbol;Acc:16685]                                                     |
| MRPS15  | 1.8  | 0.033 | mitochondrial ribosomal protein S15 [Source:HGNC Symbol;Acc:14504]                                                     |
| MRPS24  | 1.8  | 0.044 | mitochondrial ribosomal protein S24 [Source:HGNC Symbol;Acc:14510]                                                     |
| MRPS34  | 1.8  | 0.027 | mitochondrial ribosomal protein S34 [Source:HGNC Symbol;Acc:16618]                                                     |

|         |     |       |                                                                                                                        |
|---------|-----|-------|------------------------------------------------------------------------------------------------------------------------|
| MS4A4A  | 2.5 | 0.019 | membrane-spanning 4-domains, subfamily A, member 4A [Source:HGNC Symbol;Acc:13371]                                     |
| MSRB1   | 1.8 | 0.029 | methionine sulfoxide reductase B1 [Source:HGNC Symbol;Acc:14133]                                                       |
| MT2A    | 1.8 | 0.028 | metallothionein 2A [Source:HGNC Symbol;Acc:7406]                                                                       |
| MYADM   | 1.6 | 0.040 | myeloid-associated differentiation marker [Source:HGNC Symbol;Acc:7544]                                                |
| MYBL2   | 2.1 | 0.015 | v-myb myeloblastosis viral oncogene homolog (avian)-like 2 [Source:HGNC Symbol;Acc:7548]                               |
| MYEOV2  | 2.1 | 0.025 | myeloma overexpressed 2 [Source:HGNC Symbol;Acc:21314]                                                                 |
| MYL9    | 1.9 | 0.006 | myosin, light chain 9, regulatory [Source:HGNC Symbol;Acc:15754]                                                       |
| MYO10   | 4.3 | 0.002 | myosin X [Source:HGNC Symbol;Acc:7593]                                                                                 |
| NACA2   | 3.2 | 0.026 | nascent polypeptide-associated complex alpha subunit 2 [Source:HGNC Symbol;Acc:23290]                                  |
| NCL     | 1.9 | 0.045 | nucleolin [Source:HGNC Symbol;Acc:7667]                                                                                |
| NDUFA7  | 2.2 | 0.025 | NADH dehydrogenase (ubiquinone) 1 alpha subcomplex, 7, 14.5kDa [Source:HGNC Symbol;Acc:7691]                           |
| NDUFAB1 | 2.4 | 0.006 | NADH dehydrogenase (ubiquinone) 1, alpha/beta subcomplex, 1, 8kDa [Source:HGNC Symbol;Acc:7694]                        |
| NDUFS8  | 2.1 | 0.012 | NADH dehydrogenase (ubiquinone) Fe-S protein 8, 23kDa (NADH-coenzyme Q reductase) [Source:HGNC Symbol;Acc:7715]        |
| NFATC4  | 4.0 | 0.009 | nuclear factor of activated T-cells, cytoplasmic, calcineurin-dependent 4 [Source:HGNC Symbol;Acc:7778]                |
| NNMT    | 6.2 | 0.004 | nicotinamide N-methyltransferase [Source:HGNC Symbol;Acc:7861]                                                         |
| NOL7    | 2.0 | 0.034 | nucleolar protein 7, 27kDa [Source:HGNC Symbol;Acc:21040]                                                              |
| NOP10   | 1.7 | 0.037 | NOP10 ribonucleoprotein [Source:HGNC Symbol;Acc:14378]                                                                 |
| NOTCH3  | 3.2 | 0.032 | notch 3 [Source:HGNC Symbol;Acc:7883]                                                                                  |
| NPB     | 2.0 | 0.021 | neuropeptide B [Source:HGNC Symbol;Acc:30099]                                                                          |
| NPR3    | 6.8 | 0.004 | natriuretic peptide receptor C/guanylate cyclase C (atrionatriuretic peptide receptor C) [Source:HGNC Symbol;Acc:7945] |
| NQO1    | 4.5 | 0.000 | NAD(P)H dehydrogenase, quinone 1 [Source:HGNC Symbol;Acc:2874]                                                         |
| NR2F2   | 3.8 | 0.027 | nuclear receptor subfamily 2, group F, member 2 [Source:HGNC Symbol;Acc:7976]                                          |
| NR4A1   | 1.7 | 0.047 | nuclear receptor subfamily 4, group A, member 1 [Source:HGNC Symbol;Acc:7980]                                          |
| NRP1    | 3.7 | 0.028 | neuropilin 1 [Source:HGNC Symbol;Acc:8004]                                                                             |
| NUPR1   | 8.6 | 0.017 | nuclear protein, transcriptional regulator, 1 [Source:HGNC Symbol;Acc:29990]                                           |
| PACSIN3 | 8.2 | 0.001 | protein kinase C and casein kinase substrate in neurons 3 [Source:HGNC Symbol;Acc:8572]                                |
| PAPPA   | 3.5 | 0.020 | pregnancy-associated plasma protein A, pappalysin 1 [Source:HGNC Symbol;Acc:8602]                                      |



|        |      |       |                                                                                             |
|--------|------|-------|---------------------------------------------------------------------------------------------|
| PAPSS2 | 2.4  | 0.033 | 3'-phosphoadenosine 5'-phosphosulfate synthase 2 [Source:HGNC Symbol;Acc:8604]              |
| PARK7  | 1.7  | 0.034 | parkinson protein 7 [Source:HGNC Symbol;Acc:16369]                                          |
| PDE2A  | 3.2  | 0.009 | phosphodiesterase 2A, cGMP-stimulated [Source:HGNC Symbol;Acc:8777]                         |
| PDE3A  | 2.6  | 0.047 | phosphodiesterase 3A, cGMP-inhibited [Source:HGNC Symbol;Acc:8778]                          |
| PDLIM7 | 1.8  | 0.028 | PDZ and LIM domain 7 (enigma) [Source:HGNC Symbol;Acc:22958]                                |
| PHGDH  | 3.4  | 0.002 | phosphoglycerate dehydrogenase [Source:HGNC Symbol;Acc:8923]                                |
| PHLDA2 | 3.6  | 0.042 | pleckstrin homology-like domain, family A, member 2 [Source:HGNC Symbol;Acc:12385]          |
| PHLDA3 | 4.6  | 0.022 | pleckstrin homology-like domain, family A, member 3 [Source:HGNC Symbol;Acc:8934]           |
| PHLDB1 | 5.0  | 0.011 | pleckstrin homology-like domain, family B, member 1 [Source:HGNC Symbol;Acc:23697]          |
| PHPT1  | 1.9  | 0.016 | phosphohistidine phosphatase 1 [Source:HGNC Symbol;Acc:30033]                               |
| PID1   | 1.9  | 0.049 | phosphotyrosine interaction domain containing 1 [Source:HGNC Symbol;Acc:26084]              |
| PIEZO2 | 7.4  | 0.027 | piezo-type mechanosensitive ion channel component 2 [Source:HGNC Symbol;Acc:26270]          |
| PLB1   | 2.3  | 0.030 | phospholipase B1 [Source:HGNC Symbol;Acc:30041]                                             |
| PLS3   | 3.0  | 0.050 | plastin 3 [Source:HGNC Symbol;Acc:9091]                                                     |
| PMEL   | 11.6 | 0.022 | premelanosome protein [Source:HGNC Symbol;Acc:10880]                                        |
| PNP    | 1.7  | 0.023 | purine nucleoside phosphorylase [Source:HGNC Symbol;Acc:7892]                               |
| PODXL  | 3.4  | 0.007 | podocalyxin-like [Source:HGNC Symbol;Acc:9171]                                              |
| POLR2F | 2.5  | 0.013 | polymerase (RNA) II (DNA directed) polypeptide F [Source:HGNC Symbol;Acc:9193]              |
| POLR2L | 2.3  | 0.002 | polymerase (RNA) II (DNA directed) polypeptide L, 7.6kDa [Source:HGNC Symbol;Acc:9199]      |
| POSTN  | 4.0  | 0.010 | periostin, osteoblast specific factor [Source:HGNC Symbol;Acc:16953]                        |
| PPAP2C | 5.4  | 0.019 | phosphatidic acid phosphatase type 2C [Source:HGNC Symbol;Acc:9230]                         |
| PPARG  | 18.8 | 0.010 | peroxisome proliferator-activated receptor gamma [Source:HGNC Symbol;Acc:9236]              |
| PPBP   | 1.9  | 0.006 | pro-platelet basic protein (chemokine (C-X-C motif) ligand 7) [Source:HGNC Symbol;Acc:9240] |
| PRAME  | 4.2  | 0.027 | preferentially expressed antigen in melanoma [Source:HGNC Symbol;Acc:9336]                  |
| PRDX1  | 1.8  | 0.016 | peroxiredoxin 1 [Source:HGNC Symbol;Acc:9352]                                               |
| PSMA6  | 2.1  | 0.015 | proteasome (prosome, macropain) subunit, alpha type, 6 [Source:HGNC Symbol;Acc:9535]        |
| PSMB5  | 1.8  | 0.038 | proteasome (prosome, macropain) subunit, beta type, 5 [Source:HGNC Symbol;Acc:9542]         |
| PSMD4  | 2.0  | 0.017 | proteasome (prosome, macropain) 26S subunit, non-ATPase, 4 [Source:HGNC Symbol;Acc:9561]    |
| PTAFR  | 1.7  | 0.030 | platelet-activating factor receptor [Source:HGNC Symbol;Acc:9582]                           |

|         |     |       |                                                                                           |
|---------|-----|-------|-------------------------------------------------------------------------------------------|
| PTGES   | 4.7 | 0.004 | prostaglandin E synthase [Source:HGNC Symbol;Acc:9599]                                    |
| PTGFRN  | 2.8 | 0.037 | prostaglandin F2 receptor inhibitor [Source:HGNC Symbol;Acc:9601]                         |
| PTPRF   | 3.3 | 0.015 | protein tyrosine phosphatase, receptor type, F [Source:HGNC Symbol;Acc:9670]              |
| PTRF    | 4.4 | 0.000 | polymerase I and transcript release factor [Source:HGNC Symbol;Acc:9688]                  |
| PTTG1   | 2.6 | 0.048 | pituitary tumor-transforming 1 [Source:HGNC Symbol;Acc:9690]                              |
| PXDN    | 4.1 | 0.002 | peroxidasin homolog (Drosophila) [Source:HGNC Symbol;Acc:14966]                           |
| RAB34   | 1.9 | 0.039 | RAB34, member RAS oncogene family [Source:HGNC Symbol;Acc:16519]                          |
| RAB3IL1 | 5.5 | 0.018 | RAB3A interacting protein (rabin3)-like 1 [Source:HGNC Symbol;Acc:9780]                   |
| RASIP1  | 3.3 | 0.039 | Ras interacting protein 1 [Source:HGNC Symbol;Acc:24716]                                  |
| RND3    | 5.5 | 0.002 | Rho family GTPase 3 [Source:HGNC Symbol;Acc:671]                                          |
| ROBO1   | 5.2 | 0.040 | roundabout, axon guidance receptor, homolog 1 (Drosophila) [Source:HGNC Symbol;Acc:10249] |
| ROMO1   | 3.1 | 0.014 | reactive oxygen species modulator 1 [Source:HGNC Symbol;Acc:16185]                        |
| RPL14   | 1.8 | 0.017 | ribosomal protein L14 [Source:HGNC Symbol;Acc:10305]                                      |
| RPL19   | 1.9 | 0.012 | ribosomal protein L19 [Source:HGNC Symbol;Acc:10312]                                      |
| RPL22L1 | 3.3 | 0.010 | ribosomal protein L22-like 1 [Source:HGNC Symbol;Acc:27610]                               |
| RPL23A  | 1.8 | 0.021 | ribosomal protein L23a [Source:HGNC Symbol;Acc:10317]                                     |
| RPL24   | 1.7 | 0.038 | ribosomal protein L24 [Source:HGNC Symbol;Acc:10325]                                      |
| RPL26   | 2.3 | 0.001 | ribosomal protein L26 [Source:HGNC Symbol;Acc:10327]                                      |
| RPL27   | 2.3 | 0.001 | ribosomal protein L27 [Source:HGNC Symbol;Acc:10328]                                      |
| RPL27A  | 1.8 | 0.015 | ribosomal protein L27a [Source:HGNC Symbol;Acc:10329]                                     |
| RPL29   | 2.1 | 0.002 | ribosomal protein L29 [Source:HGNC Symbol;Acc:10331]                                      |
| RPL30   | 1.8 | 0.022 | ribosomal protein L30 [Source:HGNC Symbol;Acc:10333]                                      |
| RPL32   | 2.4 | 0.008 | ribosomal protein L32 [Source:HGNC Symbol;Acc:10336]                                      |
| RPL34   | 1.8 | 0.020 | ribosomal protein L34 [Source:HGNC Symbol;Acc:10340]                                      |
| RPL35   | 2.6 | 0.000 | ribosomal protein L35 [Source:HGNC Symbol;Acc:10344]                                      |
| RPL37   | 2.9 | 0.012 | ribosomal protein L37 [Source:HGNC Symbol;Acc:10347]                                      |
| RPL37A  | 2.6 | 0.006 | ribosomal protein L37a [Source:HGNC Symbol;Acc:10348]                                     |
| RPL38   | 1.9 | 0.010 | ribosomal protein L38 [Source:HGNC Symbol;Acc:10349]                                      |
| RPS11   | 1.9 | 0.040 | ribosomal protein S11 [Source:HGNC Symbol;Acc:10384]                                      |

|          |     |       |                                                                                                                                   |
|----------|-----|-------|-----------------------------------------------------------------------------------------------------------------------------------|
| RPS12    | 1.7 | 0.038 | ribosomal protein S12 [Source:HGNC Symbol;Acc:10385]                                                                              |
| RPS15    | 1.7 | 0.036 | ribosomal protein S15 [Source:HGNC Symbol;Acc:10388]                                                                              |
| RPS19    | 3.2 | 0.000 | ribosomal protein S19 [Source:HGNC Symbol;Acc:10402]                                                                              |
| RPS27    | 1.7 | 0.030 | ribosomal protein S27 [Source:HGNC Symbol;Acc:10416]                                                                              |
| RPS7     | 1.8 | 0.036 | ribosomal protein S7 [Source:HGNC Symbol;Acc:10440]                                                                               |
| RPS8     | 1.9 | 0.014 | ribosomal protein S8 [Source:HGNC Symbol;Acc:10441]                                                                               |
| RRP12    | 1.8 | 0.021 | ribosomal RNA processing 12 homolog (S. cerevisiae) [Source:HGNC Symbol;Acc:29100]                                                |
| S100A10  | 1.8 | 0.011 | S100 calcium binding protein A10 [Source:HGNC Symbol;Acc:10487]                                                                   |
| S100A12  | 1.7 | 0.033 | S100 calcium binding protein A12 [Source:HGNC Symbol;Acc:10489]                                                                   |
| S100A16  | 8.9 | 0.001 | S100 calcium binding protein A16 [Source:HGNC Symbol;Acc:20441]                                                                   |
| S100A2   | 8.8 | 0.007 | S100 calcium binding protein A2 [Source:HGNC Symbol;Acc:10492]                                                                    |
| S100A8   | 2.0 | 0.011 | S100 calcium binding protein A8 [Source:HGNC Symbol;Acc:10498]                                                                    |
| S100A9   | 3.2 | 0.001 | S100 calcium binding protein A9 [Source:HGNC Symbol;Acc:10499]                                                                    |
| SCARA3   | 6.5 | 0.005 | scavenger receptor class A, member 3 [Source:HGNC Symbol;Acc:19000]                                                               |
| SEMA3F   | 6.4 | 0.039 | sema domain, immunoglobulin domain (Ig), short basic domain, secreted, (semaphorin) 3F [Source:HGNC Symbol;Acc:10728]             |
| SERPINE1 | 3.2 | 0.012 | serpin peptidase inhibitor, clade E (nexin, plasminogen activator inhibitor type 1), member 1 [Source:HGNC Symbol;Acc:8583]       |
| SERPINH1 | 3.5 | 0.000 | serpin peptidase inhibitor, clade H (heat shock protein 47), member 1, (collagen binding protein 1) [Source:HGNC Symbol;Acc:1546] |
| SFN      | 3.7 | 0.011 | stratifin [Source:HGNC Symbol;Acc:10773]                                                                                          |
| SH3BP4   | 2.6 | 0.022 | SH3-domain binding protein 4 [Source:HGNC Symbol;Acc:10826]                                                                       |
| SH3D19   | 3.7 | 0.021 | SH3 domain containing 19 [Source:HGNC Symbol;Acc:30418]                                                                           |
| SIX2     | 8.7 | 0.035 | SIX homeobox 2 [Source:HGNC Symbol;Acc:10888]                                                                                     |
| SLC3A2   | 1.8 | 0.030 | solute carrier family 3 (activators of dibasic and neutral amino acid transport), member 2 [Source:HGNC Symbol;Acc:11026]         |
| SLC6A9   | 3.5 | 0.041 | solute carrier family 6 (neurotransmitter transporter, glycine), member 9 [Source:HGNC Symbol;Acc:11056]                          |
| SLC7A11  | 2.1 | 0.012 | solute carrier family 7 (anionic amino acid transporter light chain, xc- system), member 11 [Source:HGNC Symbol;Acc:11059]        |

|           |      |       |                                                                                                                              |
|-----------|------|-------|------------------------------------------------------------------------------------------------------------------------------|
| SLC7A5    | 2.1  | 0.003 | solute carrier family 7 (amino acid transporter light chain, L system), member 5 [Source:HGNC Symbol;Acc:11063]              |
| SLC9A3R2  | 3.4  | 0.019 | solute carrier family 9, subfamily A (NHE3, cation proton antiporter 3), member 3 regulator 2 [Source:HGNC Symbol;Acc:11076] |
| SMOC1     | 3.0  | 0.030 | SPARC related modular calcium binding 1 [Source:HGNC Symbol;Acc:20318]                                                       |
| SOD1      | 2.0  | 0.004 | superoxide dismutase 1, soluble [Source:HGNC Symbol;Acc:11179]                                                               |
| SPAG7     | 1.8  | 0.049 | sperm associated antigen 7 [Source:HGNC Symbol;Acc:11216]                                                                    |
| SPI1      | 1.8  | 0.022 | spleen focus forming virus (SFFV) proviral integration oncogene spi1 [Source:HGNC Symbol;Acc:11241]                          |
| SPINK6    | 6.5  | 0.048 | serine peptidase inhibitor, Kazal type 6 [Source:HGNC Symbol;Acc:29486]                                                      |
| SPOCK1    | 3.3  | 0.006 | sparc/osteonectin, cwcv and kazal-like domains proteoglycan (testican) 1 [Source:HGNC Symbol;Acc:11251]                      |
| SPRED1    | 4.0  | 0.025 | sprouty-related, EVH1 domain containing 1 [Source:HGNC Symbol;Acc:20249]                                                     |
| ST14      | 1.8  | 0.046 | suppression of tumorigenicity 14 (colon carcinoma) [Source:HGNC Symbol;Acc:11344]                                            |
| STAB1     | 1.9  | 0.047 | stabilin 1 [Source:HGNC Symbol;Acc:18628]                                                                                    |
| STC2      | 5.5  | 0.000 | stanniocalcin 2 [Source:HGNC Symbol;Acc:11374]                                                                               |
| STRA6     | 11.0 | 0.005 | stimulated by retinoic acid 6 [Source:HGNC Symbol;Acc:30650]                                                                 |
| TEAD1     | 2.6  | 0.046 | TEA domain family member 1 (SV40 transcriptional enhancer factor) [Source:HGNC Symbol;Acc:11714]                             |
| TEAD4     | 6.0  | 0.025 | TEA domain family member 4 [Source:HGNC Symbol;Acc:11717]                                                                    |
| TGFB1I1   | 3.0  | 0.022 | transforming growth factor beta 1 induced transcript 1 [Source:HGNC Symbol;Acc:11767]                                        |
| TIMP3     | 3.2  | 0.033 | TIMP metalloproteinase inhibitor 3 [Source:HGNC Symbol;Acc:11822]                                                            |
| TMSB10    | 1.9  | 0.027 | thymosin beta 10 [Source:HGNC Symbol;Acc:11879]                                                                              |
| TNFRSF12A | 4.3  | 0.025 | tumor necrosis factor receptor superfamily, member 12A [Source:HGNC Symbol;Acc:18152]                                        |
| TNNI2     | 3.6  | 0.020 | troponin I type 2 (skeletal, fast) [Source:HGNC Symbol;Acc:11946]                                                            |
| TPD52L1   | 4.0  | 0.027 | tumor protein D52-like 1 [Source:HGNC Symbol;Acc:12006]                                                                      |
| TPM1      | 2.4  | 0.002 | tropomyosin 1 (alpha) [Source:HGNC Symbol;Acc:12010]                                                                         |
| TPM2      | 2.6  | 0.001 | tropomyosin 2 (beta) [Source:HGNC Symbol;Acc:12011]                                                                          |
| TREM1     | 2.3  | 0.005 | triggering receptor expressed on myeloid cells 1 [Source:HGNC Symbol;Acc:17760]                                              |
| TRIM16L   | 4.2  | 0.026 | tripartite motif containing 16-like [Source:HGNC Symbol;Acc:32670]                                                           |
| TRIP6     | 2.3  | 0.025 | thyroid hormone receptor interactor 6 [Source:HGNC Symbol;Acc:12311]                                                         |
| TRNP1     | 5.2  | 0.035 | TMF1-regulated nuclear protein 1 [Source:HGNC Symbol;Acc:34348]                                                              |
| TSKU      | 5.3  | 0.005 | tsukushi, small leucine rich proteoglycan [Source:HGNC Symbol;Acc:28850]                                                     |

|                                                                                                           |      |       |                                                                                                        |
|-----------------------------------------------------------------------------------------------------------|------|-------|--------------------------------------------------------------------------------------------------------|
| TUBA1A                                                                                                    | 2.1  | 0.004 | tubulin, alpha 1a [Source:HGNC Symbol;Acc:20766]                                                       |
| TUBA1B                                                                                                    | 1.9  | 0.007 | tubulin, alpha 1b [Source:HGNC Symbol;Acc:18809]                                                       |
| TUBB2A                                                                                                    | 4.9  | 0.020 | tubulin, beta 2A class IIa [Source:HGNC Symbol;Acc:12412]                                              |
| TUBB6                                                                                                     | 2.7  | 0.022 | tubulin, beta 6 class V [Source:HGNC Symbol;Acc:20776]                                                 |
| UBL5                                                                                                      | 3.6  | 0.000 | ubiquitin-like 5 [Source:HGNC Symbol;Acc:13736]                                                        |
| UCN2                                                                                                      | 9.4  | 0.021 | urocortin 2 [Source:HGNC Symbol;Acc:18414]                                                             |
| UQCR10                                                                                                    | 1.8  | 0.027 | ubiquinol-cytochrome c reductase, complex III subunit X [Source:HGNC Symbol;Acc:30863]                 |
| UQCRFS1                                                                                                   | 2.1  | 0.019 | ubiquinol-cytochrome c reductase, Rieske iron-sulfur polypeptide 1 [Source:HGNC Symbol;Acc:12587]      |
| UQCRH                                                                                                     | 1.7  | 0.047 | ubiquinol-cytochrome c reductase hinge protein [Source:HGNC Symbol;Acc:12590]                          |
| UQCRQ                                                                                                     | 2.1  | 0.009 | ubiquinol-cytochrome c reductase, complex III subunit VII, 9.5kDa [Source:HGNC Symbol;Acc:29594]       |
| USMG5                                                                                                     | 3.1  | 0.008 | up-regulated during skeletal muscle growth 5 homolog (mouse) [Source:HGNC Symbol;Acc:30889]            |
| VIM                                                                                                       | 2.0  | 0.038 | vimentin [Source:HGNC Symbol;Acc:12692]                                                                |
| WDR62                                                                                                     | 2.4  | 0.027 | WD repeat domain 62 [Source:HGNC Symbol;Acc:24502]                                                     |
| WNT5A                                                                                                     | 3.4  | 0.006 | wingless-type MMTV integration site family, member 5A [Source:HGNC Symbol;Acc:12784]                   |
| WNT7B                                                                                                     | 4.7  | 0.032 | wingless-type MMTV integration site family, member 7B [Source:HGNC Symbol;Acc:12787]                   |
| ZNF503                                                                                                    | 4.5  | 0.008 | zinc finger protein 503 [Source:HGNC Symbol;Acc:23589]                                                 |
| <b>Genes whose expression decreased after three cycles of oxaliplatin therapy (in alphabetical order)</b> |      |       |                                                                                                        |
| ADAMTS10                                                                                                  | −1.7 | 0.042 | ADAM metalloproteinase with thrombospondin type 1 motif, 10 [Source:HGNC Symbol;Acc:13201]             |
| AGAP1                                                                                                     | −3.6 | 0.009 | ArfGAP with GTPase domain, ankyrin repeat and PH domain 1 [Source:HGNC Symbol;Acc:16922]               |
| AHSP                                                                                                      | −2.1 | 0.012 | alpha hemoglobin stabilizing protein [Source:HGNC Symbol;Acc:18075]                                    |
| ALOX15B                                                                                                   | −7.9 | 0.002 | arachidonate 15-lipoxygenase, type B [Source:HGNC Symbol;Acc:434]                                      |
| AOC3                                                                                                      | −4.1 | 0.039 | amine oxidase, copper containing 3 (vascular adhesion protein 1) [Source:HGNC Symbol;Acc:550]          |
| ATP1A3                                                                                                    | −2.5 | 0.012 | ATPase, Na <sup>+</sup> /K <sup>+</sup> transporting, alpha 3 polypeptide [Source:HGNC Symbol;Acc:801] |
| BRPF3                                                                                                     | −1.7 | 0.047 | bromodomain and PHD finger containing, 3 [Source:HGNC Symbol;Acc:14256]                                |
| BTLA                                                                                                      | −2.3 | 0.010 | B and T lymphocyte associated [Source:HGNC Symbol;Acc:21087]                                           |
| CACNA1I                                                                                                   | −1.7 | 0.029 | calcium channel, voltage-dependent, T type, alpha 1I subunit [Source:HGNC Symbol;Acc:1396]             |
| CAMP                                                                                                      | −2.8 | 0.033 | cathelicidin antimicrobial peptide [Source:HGNC Symbol;Acc:1472]                                       |
| CCL20                                                                                                     | −6.7 | 0.010 | chemokine (C-C motif) ligand 20 [Source:HGNC Symbol;Acc:10619]                                         |

|         |       |       |                                                                                                              |
|---------|-------|-------|--------------------------------------------------------------------------------------------------------------|
| CCL4    | −1.9  | 0.016 | chemokine (C-C motif) ligand 4 [Source:HGNC Symbol;Acc:10630]                                                |
| CD69    | −1.7  | 0.025 | CD69 molecule [Source:HGNC Symbol;Acc:1694]                                                                  |
| CDK5R1  | −2.4  | 0.005 | cyclin-dependent kinase 5, regulatory subunit 1 (p35) [Source:HGNC Symbol;Acc:1775]                          |
| CH25H   | −53.3 | 0.020 | cholesterol 25-hydroxylase [Source:HGNC Symbol;Acc:1907]                                                     |
| CHI3L1  | −5.3  | 0.012 | chitinase 3-like 1 (cartilage glycoprotein-39) [Source:HGNC Symbol;Acc:1932]                                 |
| CLEC4E  | −1.9  | 0.014 | C-type lectin domain family 4, member E [Source:HGNC Symbol;Acc:14555]                                       |
| CMPK1   | −1.7  | 0.034 | cytidine monophosphate (UMP-CMP) kinase 1, cytosolic [Source:HGNC Symbol;Acc:18170]                          |
| CSF3    | −51.2 | 0.023 | colony stimulating factor 3 (granulocyte) [Source:HGNC Symbol;Acc:2438]                                      |
| CXCL1   | −8.8  | 0.038 | chemokine (C-X-C motif) ligand 1 (melanoma growth stimulating activity, alpha) [Source:HGNC Symbol;Acc:4602] |
| CXCL2   | −3.4  | 0.007 | chemokine (C-X-C motif) ligand 2 [Source:HGNC Symbol;Acc:4603]                                               |
| CXCL3   | −5.0  | 0.004 | chemokine (C-X-C motif) ligand 3 [Source:HGNC Symbol;Acc:4604]                                               |
| CXCL5   | −2.1  | 0.049 | chemokine (C-X-C motif) ligand 5 [Source:HGNC Symbol;Acc:10642]                                              |
| DDIT4   | −1.8  | 0.012 | DNA-damage-inducible transcript 4 [Source:HGNC Symbol;Acc:24944]                                             |
| DLEU7   | −6.6  | 0.046 | deleted in lymphocytic leukemia, 7 [Source:HGNC Symbol;Acc:17567]                                            |
| DNAJB14 | −1.7  | 0.043 | DnaJ (Hsp40) homolog, subfamily B, member 14 [Source:HGNC Symbol;Acc:25881]                                  |
| DRAXIN  | −3.7  | 0.018 | dorsal inhibitory axon guidance protein [Source:HGNC Symbol;Acc:25054]                                       |
| DUSP1   | −2.0  | 0.010 | dual specificity phosphatase 1 [Source:HGNC Symbol;Acc:3064]                                                 |
| ECHDC3  | −5.0  | 0.010 | enoyl CoA hydratase domain containing 3 [Source:HGNC Symbol;Acc:23489]                                       |
| EGR1    | −4.7  | 0.000 | early growth response 1 [Source:HGNC Symbol;Acc:3238]                                                        |
| EGR3    | −2.6  | 0.027 | early growth response 3 [Source:HGNC Symbol;Acc:3240]                                                        |
| EMB     | −1.7  | 0.019 | embigin [Source:HGNC Symbol;Acc:30465]                                                                       |
| EREG    | −5.2  | 0.002 | epiregulin [Source:HGNC Symbol;Acc:3443]                                                                     |
| ERN1    | −2.3  | 0.001 | endoplasmic reticulum to nucleus signaling 1 [Source:HGNC Symbol;Acc:3449]                                   |
| ETS2    | −1.7  | 0.028 | v-ets erythroblastosis virus E26 oncogene homolog 2 (avian) [Source:HGNC Symbol;Acc:3489]                    |
| FBXO32  | −1.8  | 0.017 | F-box protein 32 [Source:HGNC Symbol;Acc:16731]                                                              |
| FCRL1   | −1.7  | 0.024 | Fc receptor-like 1 [Source:HGNC Symbol;Acc:18509]                                                            |
| FCRL6   | −1.9  | 0.006 | Fc receptor-like 6 [Source:HGNC Symbol;Acc:31910]                                                            |
| FKBP5   | −2.7  | 0.000 | FK506 binding protein 5 [Source:HGNC Symbol;Acc:3721]                                                        |

|          |       |       |                                                                                                                         |
|----------|-------|-------|-------------------------------------------------------------------------------------------------------------------------|
| FOS      | −1.8  | 0.033 | FBJ murine osteosarcoma viral oncogene homolog [Source:HGNC Symbol;Acc:3796]                                            |
| GAPT     | −1.8  | 0.026 | GRB2-binding adaptor protein, transmembrane [Source:HGNC Symbol;Acc:26588]                                              |
| GFRA1    | −17.2 | 0.000 | GNDF family receptor alpha 1 [Source:HGNC Symbol;Acc:4243]                                                              |
| GJB2     | −48.9 | 0.020 | gap junction protein, beta 2, 26kDa [Source:HGNC Symbol;Acc:4284]                                                       |
| GPR56    | −1.9  | 0.021 | G protein-coupled receptor 56 [Source:HGNC Symbol;Acc:4512]                                                             |
| GPR97    | −2.5  | 0.044 | G protein-coupled receptor 97 [Source:HGNC Symbol;Acc:13728]                                                            |
| HCST     | −1.9  | 0.008 | hematopoietic cell signal transducer [Source:HGNC Symbol;Acc:16977]                                                     |
| HIST1H4C | −6.6  | 0.044 | histone cluster 1, H4c [Source:HGNC Symbol;Acc:4787]                                                                    |
| HLA-DQA2 | −2.1  | 0.034 | major histocompatibility complex, class II, DQ alpha 2 [Source:HGNC Symbol;Acc:4943]                                    |
| HNRNPD   | −6.5  | 0.044 | heterogeneous nuclear ribonucleoprotein D (AU-rich element RNA binding protein 1, 37kDa) [Source:HGNC Symbol;Acc:5036]  |
| IGJ      | −2.0  | 0.004 | immunoglobulin J polypeptide, linker protein for immunoglobulin alpha and mu polypeptides [Source:HGNC Symbol;Acc:5713] |
| IKZF3    | −1.7  | 0.026 | IKAROS family zinc finger 3 (Aiolos) [Source:HGNC Symbol;Acc:13178]                                                     |
| IL1A     | −12.1 | 0.012 | interleukin 1, alpha [Source:HGNC Symbol;Acc:5991]                                                                      |
| IL1B     | −4.2  | 0.000 | interleukin 1, beta [Source:HGNC Symbol;Acc:5992]                                                                       |
| IL6      | −7.0  | 0.000 | interleukin 6 (interferon, beta 2) [Source:HGNC Symbol;Acc:6018]                                                        |
| IL6ST    | −1.7  | 0.042 | interleukin 6 signal transducer (gp130, oncostatin M receptor) [Source:HGNC Symbol;Acc:6021]                            |
| IL7R     | −1.9  | 0.023 | interleukin 7 receptor [Source:HGNC Symbol;Acc:6024]                                                                    |
| IL8      | −14.5 | 0.000 | interleukin 8 [Source:HGNC Symbol;Acc:6025]                                                                             |
| INHBA    | −19.6 | 0.001 | inhibin, beta A [Source:HGNC Symbol;Acc:6066]                                                                           |
| IPCEF1   | −1.8  | 0.019 | interaction protein for cytohesin exchange factors 1 [Source:HGNC Symbol;Acc:21204]                                     |
| KIAA1551 | −2.0  | 0.008 | KIAA1551 [Source:HGNC Symbol;Acc:25559]                                                                                 |
| KIR3DX1  | −2.8  | 0.041 | killer cell immunoglobulin-like receptor, three domains, X1 [Source:HGNC Symbol;Acc:25043]                              |
| KLF9     | −2.0  | 0.007 | Kruppel-like factor 9 [Source:HGNC Symbol;Acc:1123]                                                                     |
| KLRD1    | −2.0  | 0.007 | killer cell lectin-like receptor subfamily D, member 1 [Source:HGNC Symbol;Acc:6378]                                    |
| KRT23    | −4.1  | 0.039 | keratin 23 (histone deacetylase inducible) [Source:HGNC Symbol;Acc:6438]                                                |
| LCNL1    | −3.3  | 0.029 | lipocalin-like 1 [Source:HGNC Symbol;Acc:34436]                                                                         |
| LGR6     | −1.8  | 0.042 | leucine-rich repeat containing G protein-coupled receptor 6 [Source:HGNC Symbol;Acc:19719]                              |

|         |      |       |                                                                                                                      |
|---------|------|-------|----------------------------------------------------------------------------------------------------------------------|
| LRRN3   | −2.0 | 0.040 | leucine rich repeat neuronal 3 [Source:HGNC Symbol;Acc:17200]                                                        |
| LTF     | −3.5 | 0.001 | lactotransferrin [Source:HGNC Symbol;Acc:6720]                                                                       |
| MAGT1   | −1.9 | 0.017 | magnesium transporter 1 [Source:HGNC Symbol;Acc:28880]                                                               |
| MAN1A1  | −1.8 | 0.018 | mannosidase, alpha, class 1A, member 1 [Source:HGNC Symbol;Acc:6821]                                                 |
| METTL7A | −1.7 | 0.021 | methyltransferase like 7A [Source:HGNC Symbol;Acc:24550]                                                             |
| MMP25   | −1.8 | 0.049 | matrix metalloproteinase 25 [Source:HGNC Symbol;Acc:14246]                                                           |
| MMP9    | −6.5 | 0.001 | matrix metalloproteinase 9 (gelatinase B, 92kDa gelatinase, 92kDa type IV collagenase) [Source:HGNC Symbol;Acc:7176] |
| MS4A3   | −3.7 | 0.025 | membrane-spanning 4-domains, subfamily A, member 3 (hematopoietic cell-specific) [Source:HGNC Symbol;Acc:7317]       |
| MYLIP   | −1.8 | 0.023 | myosin regulatory light chain interacting protein [Source:HGNC Symbol;Acc:21155]                                     |
| NEU4    | −5.0 | 0.027 | sialidase 4 [Source:HGNC Symbol;Acc:21328]                                                                           |
| NPEPPS  | −1.6 | 0.050 | aminopeptidase puromycin sensitive [Source:HGNC Symbol;Acc:7900]                                                     |
| NR3C2   | −2.0 | 0.032 | nuclear receptor subfamily 3, group C, member 2 [Source:HGNC Symbol;Acc:7979]                                        |
| NUDT16  | −1.7 | 0.024 | nudix (nucleoside diphosphate linked moiety X)-type motif 16 [Source:HGNC Symbol;Acc:26442]                          |
| PDK4    | −2.2 | 0.006 | pyruvate dehydrogenase kinase, isozyme 4 [Source:HGNC Symbol;Acc:8812]                                               |
| PIGV    | −2.1 | 0.022 | phosphatidylinositol glycan anchor biosynthesis, class V [Source:HGNC Symbol;Acc:26031]                              |
| PIK3IP1 | −1.7 | 0.036 | phosphoinositide-3-kinase interacting protein 1 [Source:HGNC Symbol;Acc:24942]                                       |
| PKP2    | −6.4 | 0.005 | plakophilin 2 [Source:HGNC Symbol;Acc:9024]                                                                          |
| PLEKHG3 | −2.1 | 0.024 | pleckstrin homology domain containing, family G (with RhoGef domain) member 3 [Source:HGNC Symbol;Acc:20364]         |
| POU2AF1 | −1.8 | 0.021 | POU class 2 associating factor 1 [Source:HGNC Symbol;Acc:9211]                                                       |
| PRDM1   | −2.1 | 0.017 | PR domain containing 1, with ZNF domain [Source:HGNC Symbol;Acc:9346]                                                |
| PRKAB2  | −1.7 | 0.036 | protein kinase, AMP-activated, beta 2 non-catalytic subunit [Source:HGNC Symbol;Acc:9379]                            |
| PRRX1   | −6.5 | 0.003 | paired related homeobox 1 [Source:HGNC Symbol;Acc:9142]                                                              |
| PTGDR   | −2.2 | 0.032 | prostaglandin D2 receptor (DP) [Source:HGNC Symbol;Acc:9591]                                                         |
| PTGS2   | −5.2 | 0.000 | prostaglandin-endoperoxide synthase 2 (prostaglandin G/H synthase and cyclooxygenase) [Source:HGNC Symbol;Acc:9605]  |
| RAB7L1  | −1.7 | 0.038 | RAB7, member RAS oncogene family-like 1 [Source:HGNC Symbol;Acc:9789]                                                |



|          |       |       |                                                                                                              |
|----------|-------|-------|--------------------------------------------------------------------------------------------------------------|
| RASD2    | −21.8 | 0.011 | RASD family, member 2 [Source:HGNC Symbol;Acc:18229]                                                         |
| RNF165   | −2.9  | 0.048 | ring finger protein 165 [Source:HGNC Symbol;Acc:31696]                                                       |
| RNF4     | −1.6  | 0.048 | ring finger protein 4 [Source:HGNC Symbol;Acc:10067]                                                         |
| SERPINB2 | −38.5 | 0.000 | serpin peptidase inhibitor, clade B (ovalbumin), member 2 [Source:HGNC Symbol;Acc:8584]                      |
| SESN1    | −2.7  | 0.000 | sestrin 1 [Source:HGNC Symbol;Acc:21595]                                                                     |
| SGCA     | −12.0 | 0.040 | sarcoglycan, alpha (50kDa dystrophin-associated glycoprotein) [Source:HGNC Symbol;Acc:10805]                 |
| SLAMF6   | −1.7  | 0.022 | SLAM family member 6 [Source:HGNC Symbol;Acc:21392]                                                          |
| SLC1A3   | −13.3 | 0.000 | solute carrier family 1 (glial high affinity glutamate transporter), member 3 [Source:HGNC Symbol;Acc:10941] |
| SLC22A1  | −6.8  | 0.012 | solute carrier family 22 (organic cation transporter), member 1 [Source:HGNC Symbol;Acc:10963]               |
| SLC4A7   | −1.8  | 0.016 | solute carrier family 4, sodium bicarbonate cotransporter, member 7 [Source:HGNC Symbol;Acc:11033]           |
| SMAP2    | −1.8  | 0.042 | small ArfGAP2 [Source:HGNC Symbol;Acc:25082]                                                                 |
| SOCS3    | −1.6  | 0.039 | suppressor of cytokine signaling 3 [Source:HGNC Symbol;Acc:19391]                                            |
| SOD2     | −15.7 | 0.020 | superoxide dismutase 2, mitochondrial [Source:HGNC Symbol;Acc:11180]                                         |
| SPRY1    | −7.6  | 0.002 | sprouty homolog 1, antagonist of FGF signaling (Drosophila) [Source:HGNC Symbol;Acc:11269]                   |
| TBX15    | −6.0  | 0.018 | T-box 15 [Source:HGNC Symbol;Acc:11594]                                                                      |
| TCL1A    | −2.1  | 0.004 | T-cell leukemia/lymphoma 1A [Source:HGNC Symbol;Acc:11648]                                                   |
| THBS1    | −3.9  | 0.000 | thrombospondin 1 [Source:HGNC Symbol;Acc:11785]                                                              |
| TTC9     | −1.8  | 0.047 | tetratricopeptide repeat domain 9 [Source:HGNC Symbol;Acc:20267]                                             |
| TTLL10   | −18.8 | 0.029 | tubulin tyrosine ligase-like family, member 10 [Source:HGNC Symbol;Acc:26693]                                |
| UBA52    | −2.0  | 0.039 | ubiquitin A-52 residue ribosomal protein fusion product 1 [Source:HGNC Symbol;Acc:12458]                     |
| USP28    | −1.7  | 0.039 | ubiquitin specific peptidase 28 [Source:HGNC Symbol;Acc:12625]                                               |
| USP9Y    | −2.0  | 0.036 | ubiquitin specific peptidase 9, Y-linked [Source:HGNC Symbol;Acc:12633]                                      |
| XBP1     | −1.7  | 0.025 | X-box binding protein 1 [Source:HGNC Symbol;Acc:12801]                                                       |
| YPEL1    | −4.0  | 0.024 | yippee-like 1 (Drosophila) [Source:HGNC Symbol;Acc:12845]                                                    |
| ZBTB38   | −1.7  | 0.033 | zinc finger and BTB domain containing 38 [Source:HGNC Symbol;Acc:26636]                                      |
